# Supplementary material for: The Antiviral and Virucidal Activities of Voacangine and Structural Analogs Extracted from Tabernaemontana cymosa Depend on the Dengue Virus Strain
Source: MDPI journal article supplement (doi:10.3390/plants10071280), 2021-06-23
Supplement: s1 [file s1]

**Table S2.**  $^{13}\text{C}$  and  $^1\text{H}$  NMR nuclear magnetic resonance assignments of Rupicoline (**TcK004**) isolated from the ethanol extract of seeds of *Tabernaemontana cymosa* Jacq., comparing to those reported in the literature.

| Carbon                          | TcK004          |              | [1]             |              | [2]             |              |
|---------------------------------|-----------------|--------------|-----------------|--------------|-----------------|--------------|
|                                 | $^{13}\text{C}$ | $^1\text{H}$ | $^{13}\text{C}$ | $^1\text{H}$ | $^{13}\text{C}$ | $^1\text{H}$ |
| 2                               | 68,39           |              | 68,5            |              | 68,5            |              |
| 3                               | 52,07           |              | 52,1            |              | 51,9            |              |
| 5                               | 47,67           |              | 47,4            |              | 47,4            |              |
| 6                               | 25,77           |              | 26,1            |              | 25,7            |              |
| 7                               | 202,90          |              | 202,9           |              | 203             |              |
| 8                               | 121,78          |              | 121,7           |              | 153,9           |              |
| 9                               | 104,63          | 7,02         | 104,5           | 7,02         | 104,5           | 7,06         |
| 10                              | 153,82          |              | 153,6           |              | 154,1           |              |
| 11                              | 126,89          | 7,07         | 126,5           | 7,06         | 126,5           | 7,1          |
| 12                              | 114,12          | 6,76         | 112,1           | 6,74         | 113,8           | 6,78         |
| 13                              | 154,21          |              | 154             |              | 153,3           |              |
| 14                              | 31,10           |              | 30,7            |              | 26,1            |              |
| 15                              | 31,10           |              | 25,7            |              | 31,1            |              |
| 16                              | 52,12           |              | 51,9            |              | 52              |              |
| 17                              | 30,80           |              | 31,1            |              | 30,7            |              |
| 18                              | 12,14           | 0,91         | 12              | 0,9          | 11,9            | 0,94         |
| 19                              | 28,69           |              | 28,6            |              | 28,6            |              |
| 20                              | 35,81           |              | 35,8            |              | 35,8            |              |
| 21                              | 52,05           | 3,95         | 51              | 3,9          | 51              |              |
| 22                              | 174,57          |              | 174,8           |              | 174,8           |              |
| CO <sub>2</sub> CH <sub>3</sub> | 52,07           | 3,3          | 51,7            | 3,3          | 51,7            | 3,33         |
| OCH <sub>3</sub>                | 55,90           | 3,76         | 55,7            | 3,76         | 55,7            | 3,8          |

1. Husain, K.; Said, I.M.; Din, L.B.; Takayama, H.; Kitajima, M.; Aimi, N. Alkaloids from The Roots of *Tabernaemontana Macrocarpa* Jack. *Natural Product Sciences* **1997**, 3, 42-48.
2. Madinaveitia Martin, A. Alcaloides de las especies *Rauwolfia sprucei*, *Stemmadenia obovata*, *Delphinium cardipetalum* y *Withania aristata*: Contribución a la química de los alcaloides tipo Iboga. **1998**.
