# Supplementary material for: The Antiviral and Virucidal Activities of Voacangine and Structural Analogs Extracted from Tabernaemontana cymosa Depend on the Dengue Virus Strain
Source: MDPI journal article supplement (doi:10.3390/plants10071280), 2021-06-23
Supplement: s1 [file s1]

**Table S1.**  $^{13}\text{C}$  and  $^1\text{H}$  NMR nuclear magnetic resonance assignments of Voacangine-7-hydroxyindolenine (**TcK002**) isolated from the ethanol extract of seeds of *Tabernaemontana cymosa* Jacq., comparing to those reported in the literature.

|                                 | TcK002          |              | [1]             |              | [2]             |              | [3]             |              |
|---------------------------------|-----------------|--------------|-----------------|--------------|-----------------|--------------|-----------------|--------------|
| Carbon                          | $^{13}\text{C}$ | $^1\text{H}$ | $^{13}\text{C}$ | $^1\text{H}$ | $^{13}\text{C}$ | $^1\text{H}$ | $^{13}\text{C}$ | $^1\text{H}$ |
| 2                               | 186,97          |              | 186,8           |              | 188,1           |              | 186,8           |              |
| 3                               | 48,75           |              | 48,6            |              | 48,7            |              | 48,6            |              |
| 5                               | 49,22           |              | 49              |              | 48,9            |              | 49,1            |              |
| 6                               | 34,25           |              | 34,1            |              | 32,2            |              | 34,2            |              |
| 7                               | 88,43           |              | 88,3            |              | 87,3            |              | 88,3            |              |
| 8                               | 144,53          |              | 144,4           |              | 144,9           |              | 144,4           |              |
| 9                               | 108,09          | 6,91         | 107,9           | 6,9          | 108,4           |              | 107,9           | 6,94         |
| 10                              | 159,23          |              | 159,1           |              | 158,4           |              | 159,1           |              |
| 11                              | 113,85          | 6,8          | 113,7           | 6,81         | 113,3           |              | 113,7           | 6,84         |
| 12                              | 121,49          | 7,36         | 121,3           | 7,37         | 121,6           |              | 121,3           | 7,4          |
| 13                              | 144,90          |              | 144,8           |              | 143,9           |              | 144,8           |              |
| 14                              | 27,08           |              | 27              |              | 28,4            |              | 27              |              |
| 15                              | 32,14           |              | 32              |              | 30,5            |              | 32              |              |
| 16                              | 55,88           |              | 58,5            |              | 57,5            |              | 58,5            |              |
| 17                              | 34,63           |              | 34,5            |              | 36,7            |              | 34,5            |              |
| 18                              | 11,71           | 0,86         | 11,5            | 0,86         | 11,7            |              | 11,5            | 0,9          |
| 19                              | 26,62           |              | 26,5            |              | 27,1            |              | 26,5            |              |
| 20                              | 37,68           |              | 37,5            |              | 38,9            |              | 37,5            |              |
| 21                              | 58,68           |              | 58,4            |              | 55,5            |              | 58,5            |              |
| 22                              | 174,05          |              | 173,9           |              | 172,6           |              | 173,8           |              |
| CO <sub>2</sub> CH <sub>3</sub> | 53,39           | 3,7          | 55,3            | 3,7          | 52,5            |              | 53,1            | 3,74         |
| OCH <sub>3</sub>                | 55,88           | 3,82         | 55,7            | 3,81         | 54,9            |              | 55,7            | 3,85         |

1. Pereira, P.S.; França, S.d.C.; Oliveira, P.V.A.d.; Breves, C.M.d.S.; Pereira, S.I.V.; Sampaio, S.V.; Nomizo, A.; Dias, D.A. Chemical constituents from *Tabernaemontana catharinensis* root bark: a brief NMR review of indole alkaloids and in vitro cytotoxicity. *Química Nova* **2008**, *31*, 20-24.
2. Sharma, P.; Cordell, G.A. Heyneanine hydroxyindolenine, a new indole alkaloid from *Ervatamia coronaria* var. plena. *Journal of natural products* **1988**, *51*, 528-531.
3. Madinaveitia Martin, A. Alcaloides de las especies *Rauwolfia sprucei*, *Stemmadenia obovata*, *Delphinium cardipetalum* y *Withania aristata*: Contribución a la química de los alcaloides tipo Iboga. **1998**.
